# Supplementary material
Source: ML conference proceedings conference paper supplement (https://aclanthology.org/2022.emnlp-main.428)

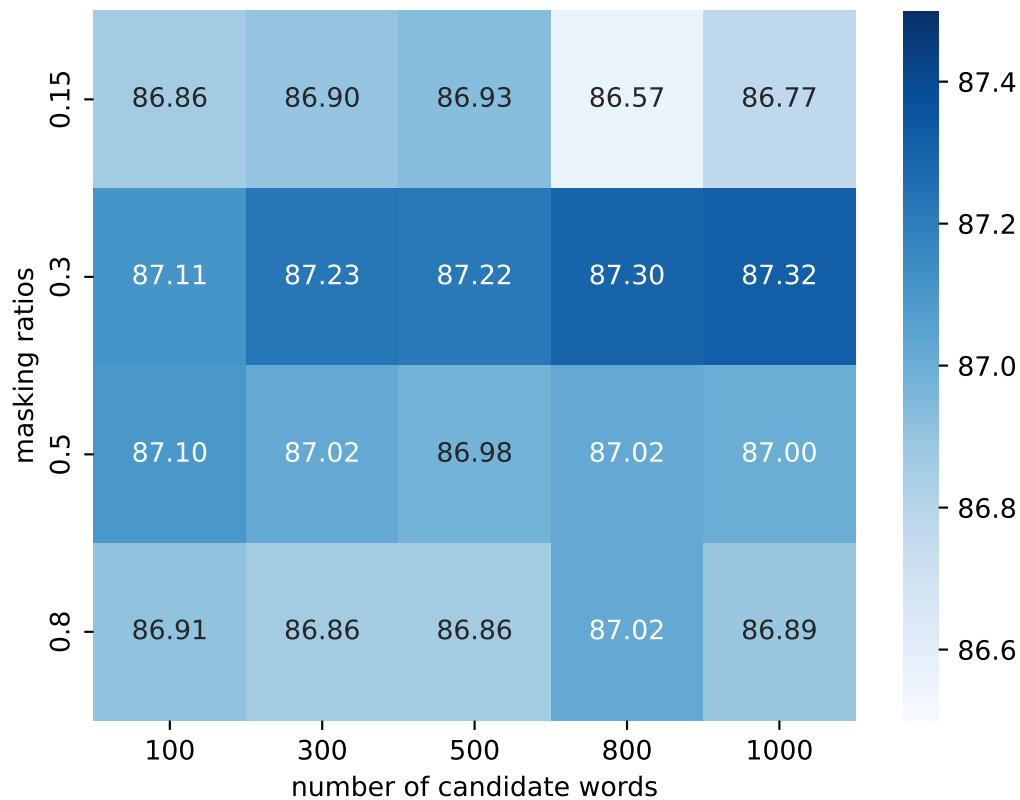

Supplement: software [file 2022.emnlp-main.428.software.zip]
